# Supplementary material
Source: PubMed Central journal article supplement (PMC3158157)
Supplement: 1110242108_pnas.1110242108_SI.pdf [file 1110242108_pnas.1110242108_SI.pdf]

# Supporting Information

Rosenberg et al. 10.1073/pnas.1110242108

## SI Materials and Methods

**EspR ChIP.** *Mycobacterium smegmatis* (50 mL) cultures were grown at 37 °C to OD<sub>600</sub> = 0.5 in 7H9 (0.05% Tween 80, appropriate antibiotics), pelleted, fixed in fresh 4% (wt/vol) paraformaldehyde at room temperature for 20 min, and quenched in 125 mM glycine for 5 min. Pellets were washed twice in cold Tris buffered saline [20 mM Tris·HCl (pH 7.5), 150 mM NaCl] and suspended in 350 μL lysis buffer [50 mM Hepes-KOH (pH 7.5), 140 mM NaCl, 1 mM EDTA, 1% Triton X-100, 0.1% sodium deoxycholate] with protease inhibitors. Cells were lysed by sonication in a Diagenode Bioruptor water bath sonicator and pelleted. Cell extracts were further sonicated to shear DNA fragments to a mean size of 200 bp, at which point a sample was stored at -20 °C as input material.

Immunoprecipitations (IPs) were performed by incubation with 3 μL monoclonal anti-FLAG M2 antibody (Sigma) at 4 °C overnight, followed by incubation with 50 μL magnetic Dynabeads (Invitrogen) for 2 h while rocking at 4 °C. Beads were subjected to two washes in lysis buffer, two washes with wash buffer [10 mM Tris·HCl (pH 8.0), 250 mM LiCl, 0.5% NP-40, 0.5% sodium deoxycholate, 1 mM EDTA], and one wash in TE [10 mM Tris (pH 8.0), 1 mM EDTA]. Next, 110 μL elution buffer [50 mM Tris·HCl (pH 8.0), 10 mM EDTA, 1% SDS] was added to each sample, and the beads were incubated for 15 min at 65 °C and pelleted. A second elution was performed with 150 μL of elution buffer 2 (TE, 0.67% SDS) and eluates from the two elution steps were combined. Formaldehyde crosslinks were reversed by incubating IP and input samples at 65 °C overnight. Samples were treated with 250 μL proteinase K solution (TE, 20 μg/mL

glycogen, 400 μg/mL proteinase K) and incubated at 37 °C for 2 h. Nucleic acids were extracted with phenol/chloroform/isoamyl alcohol solution (25:24:1), precipitated with LiCl/ethanol, and resuspended in 25 μL TE containing 100 μg/mL RNaseA.

Quantitative RT-PCR was performed using primer pairs (Table S3) that spanned the entire *espACD* upstream intergenic region, using Taq polymerase in the presence of SYBR Green on an Opticon Real-Time PCR Detection System (Bio-Rad Laboratories, Inc.). IP samples were used as a direct template for PCR, and reactions were quantified using standard curves generated for each primer pair with input material for that sample. Data were normalized to signal from a nonenriched region (16S rRNA) for each sample.

**EMSA.** DNA probes were PCR-amplified from a plasmid template and gel purified. The following primer pairs correspond to each probe: BC<sub>364</sub> (oCD208/oCD143), B<sub>240</sub> (oMT26/oCD143), C<sub>124</sub> (oCD208/oMT25). Labeled probes were generated using 5'-5-FAM prelabeled oligonucleotides (Bioneer, Inc.), with the label on one strand only. The B<sub>48</sub> probe was generated by annealing oligonucleotides oCD166 (5-FAM) and oCD167. Binding reactions were performed with purified protein and 5 nM probe for 30 min at room temperature in EMSA buffer [10 mM Tris (pH 8.0), 50 mM NaCl, 1 mM DTT, 100 μg/mL BSA, 1 mM EDTA, 5% (vol/vol) glycerol, and 30 μg/mL poly(deoxyinosinic-deoxycytidylic) (Sigma)]. Reactions were resolved at room temperature on a 4–20% Tris-glycine gel (Invitrogen) and visualized using a Typhoon Fluorescence Imager (GE Healthcare).



**Table S1. Crystallographic and refinement statistics**

|                                       | Se-Met                    | Se-Met (peak phasing)     | Se-Met (high remote phasing) |
|---------------------------------------|---------------------------|---------------------------|------------------------------|
| <b>Data Collection</b>                |                           |                           |                              |
| X-ray source                          | ALS BI 8.3.1              | ALS BI 8.3.1              | ALS BI 8.3.1                 |
| Wavelength                            | 1.115889                  | 0.9797                    | 0.9570                       |
| Resolution                            | 50–2.5                    | 50–2.7                    | 50–2.7                       |
| Space group (twinning operator)       | $P3_2 (-k, -h, -l)$       | $P3_2 12$                 | $P3_2 12$                    |
| Cell parameters, Å, °                 | $a = 148.49$ $c = 129.67$ | $a = 149.03$ $c = 129.36$ | $a = 149.03$ $c = 129.33$    |
| Molecules per ASU                     | 18                        | 18                        | 18                           |
| Unique reflections (test set)         | 100,721 (5,413)           | 88,375                    | 94,197                       |
| Redundancy                            | 2.1 (2.0)                 | 3.7 (3.7)                 | 3.7 (3.7)                    |
| Mn ( $I/\sigma$ )                     | 3.9 (1.5)                 | 5.1 (1.2)                 | 5.2 (3.1)                    |
| Completeness                          | 91.05 (86.9)              | 100 (99.9)                | 100 (100)                    |
| $R_{\text{sym}}^*$                    | 0.140 (0.73)              | 0.258 (0.839)             | 0.279 (0.959)                |
| <b>Refinement</b>                     |                           |                           |                              |
| $R_{\text{work}}/R_{\text{free}}$ , % | 19.7/23.2                 |                           |                              |
| No. atoms                             | 17,208                    |                           |                              |
| rmsd                                  |                           |                           |                              |
| Bond length, Å                        | 0.010                     |                           |                              |
| Bond angles, °                        | 1.249                     |                           |                              |
| Twinning fraction, $\alpha$           | 0.5                       |                           |                              |

ALS BI, Advanced Light Source Beamline; ASU, asymmetric unit; Se-Met, selenomethionine.

\* $R_{\text{sym}} = \sum |I - \langle I \rangle| / \sum I$  where  $\langle I \rangle$  is the average intensity over symmetry equivalents.

**Table S2. Strains and plasmids used in this study**

| Strains/plasmids    | Genotype/description                                  | Resistance | Source     |
|---------------------|-------------------------------------------------------|------------|------------|
| <b>M. smegmatis</b> |                                                       |            |            |
| mc <sup>2</sup> 155 | wild type                                             | —          | (1)        |
| CDMS165             | mc <sup>2</sup> 155 + pCD165                          | Zeo        | This study |
| CDMS165/501         | CDMS165 + pROW501                                     | Zeo, Kan   | This study |
| CDMS165/182         | CDMS165 + pCD182                                      | Zeo, Kan   | This study |
| CDMS165/173         | CDMS165 + pCD173                                      | Zeo, Kan   | This study |
| <b>Plasmid</b>      |                                                       |            |            |
| pLIC-HMK            | T7 promoter-6XHis-MBP-TEV                             | Kan        | (2)        |
| pCD99               | pLIC-HMK + $espR_{\text{Mtb}}$                        | Kan        | This study |
| pH3C                | T7 promoter-6XHis-MBP-3C                              | Kan        | (3)        |
| pCD174              | pH3C + $espR_{\text{Mtb}}$                            | Kan        | This study |
| pCD177              | pH3C + $espR_{\text{Mtb}}$ (amino acids 1–107)        | Kan        | This study |
| pMV261.Zeo          | $oriM$ , $oriE$ , $groEL$ promoter                    | Zeo        | This study |
| pCD165              | pMV261.Zeo + $espR_{\text{Mtb}}$ -3X-FLAG             | Zeo        | This study |
| pMV306.Kan          | $int$ , $oriE$                                        | Kan        | MedImmune  |
| pROW501             | pMV306.Kan + full intergenic region- $espA$ - $luxAB$ | Kan        | This study |
| pCD182              | pROW501 (aBC)                                         | Kan        | This study |
| pCD173              | pROW501 (AbC)                                         | Kan        | This study |
| pCD180              | pROW501 (ABc)                                         | Kan        | This study |
| pCD181              | pROW501 (Abc)                                         | Kan        | This study |
| pCD189              | pMV306.Kan + BC <sub>364</sub> region                 | Kan        | This study |

MBP, maltose-binding protein; TEV, tobacco etch virus.

- Snapper SB, Melton RE, Mustafa S, Kieser T, Jacobs WR, Jr. (1990) Isolation and characterization of efficient plasmid transformation mutants of *Mycobacterium smegmatis*. *Mol Microbiol* 4:1911–1919.
- Kapust RB, Waugh DS (1999) *Escherichia coli* maltose-binding protein is uncommonly effective at promoting the solubility of polypeptides to which it is fused. *Protein Sci* 8:1668–1674.
- Hammon J, Palanivelu DV, Chen J, Patel C, Minor DL, Jr. (2009) A green fluorescent protein screen for identification of well-expressed membrane proteins from a cohort of extremophilic organisms. *Protein Sci* 18:121–133.
